# Supplementary material
Source: Research Square preprint supplement (doi:10.21203/rs.3.rs-9996948/v1)
Supplement: Supplementary file 1 [file 8022048197588e838730181f.docx]

**Table S1.** Multiplicative interaction between TyHGB and CRP for incident CMM.

| **Model** | **N** | **CMM events** | **Interaction term** | **HR for multiplicative interaction (95% CI)** | **P value** |
| --- | --- | --- | --- | --- | --- |
| Model 1 | 3,857 | 372 | TyHGB × CRP | 0.727 (0.458, 1.154) | 0.176 |
| Model 2 | 3,857 | 372 | TyHGB × CRP | 0.714 (0.449, 1.134) | 0.153 |
| Model 3 | 3,857 | 372 | TyHGB × CRP | 0.677 (0.426, 1.076) | 0.099 |

Model adjustment was the same as described in Table 2.

**Table S2.** Additive interaction between TyHGB and CRP for incident CMM.

| **Model** | **N** | **CMM events** | **Measure** | **Estimate (95% CI)** | **P value** |
| --- | --- | --- | --- | --- | --- |
| Model 1 | 3,857 | 372 | RERI | -0.267 (-1.221, 0.687) | 0.583 |
| AP | -0.079 (-0.361, 0.203) | 0.583 |
| SI | 0.899 (0.626, 1.291) | 0.564 |
| Model 2 | RERI | -0.332 (-1.282, 0.617) | 0.493 |
| AP | -0.102 (-0.392, 0.189) | 0.492 |
| SI | 0.872 (0.604, 1.258) | 0.464 |
| Model 3 | RERI | -0.509 (-1.420, 0.401) | 0.273 |
| AP | -0.179 (-0.496, 0.138) | 0.269 |
| SI | 0.784 (0.533, 1.154) | 0.217 |

Model adjustment was the same as described in Table 2.

**Table S3.** Internal validation of time-dependent AUC and Harrell C-index for complete-case prediction models.

| **Method** | **Model** | **Metric** | **Time point** | **N** | **Events** | **Estimate** | **Delta vs base** | **Empirical interval** | **Mean optimism** |
| --- | --- | --- | --- | --- | --- | --- | --- | --- | --- |
| Apparent | Base model | Time-dependent AUC | 3-year | 2,745 | 289 | 0.688 | 0.000 |  |  |
| Apparent | Base + TyHGB | Time-dependent AUC | 3-year | 2,745 | 289 | 0.715 | 0.027 |  |  |
| Apparent | Base + CRP | Time-dependent AUC | 3-year | 2,745 | 289 | 0.703 | 0.015 |  |  |
| Apparent | Base + TyHGB + CRP | Time-dependent AUC | 3-year | 2,745 | 289 | 0.721 | 0.033 |  |  |
| Apparent | Base + joint TyHGB-CRP exposure | Time-dependent AUC | 3-year | 2,745 | 289 | 0.744 | 0.056 |  |  |
| Apparent | Base model | Time-dependent AUC | 5-year | 2,745 | 289 | 0.670 | 0.000 |  |  |
| Apparent | Base + TyHGB | Time-dependent AUC | 5-year | 2,745 | 289 | 0.691 | 0.021 |  |  |
| Apparent | Base + CRP | Time-dependent AUC | 5-year | 2,745 | 289 | 0.673 | 0.003 |  |  |
| Apparent | Base + TyHGB + CRP | Time-dependent AUC | 5-year | 2,745 | 289 | 0.691 | 0.021 |  |  |
| Apparent | Base + joint TyHGB-CRP exposure | Time-dependent AUC | 5-year | 2,745 | 289 | 0.700 | 0.030 |  |  |
| Apparent | Base model | Harrell C-index | Overall | 2,745 | 289 | 0.645 | 0.000 |  |  |
| Apparent | Base + TyHGB | Harrell C-index | Overall | 2,745 | 289 | 0.667 | 0.022 |  |  |
| Apparent | Base + CRP | Harrell C-index | Overall | 2,745 | 289 | 0.646 | 0.001 |  |  |
| Apparent | Base + TyHGB + CRP | Harrell C-index | Overall | 2,745 | 289 | 0.667 | 0.022 |  |  |
| Apparent | Base + joint TyHGB-CRP exposure | Harrell C-index | Overall | 2,745 | 289 | 0.686 | 0.041 |  |  |
| 5x5-fold CV | Base model | Time-dependent AUC | 3-year | 2,745 | 289 | 0.667 | 0.000 | 0.658, 0.680 |  |
| 5x5-fold CV | Base + TyHGB | Time-dependent AUC | 3-year | 2,745 | 289 | 0.692 | 0.025 | 0.684, 0.703 |  |
| 5x5-fold CV | Base + CRP | Time-dependent AUC | 3-year | 2,745 | 289 | 0.680 | 0.012 | 0.670, 0.697 |  |
| 5x5-fold CV | Base + TyHGB + CRP | Time-dependent AUC | 3-year | 2,745 | 289 | 0.697 | 0.030 | 0.689, 0.708 |  |
| 5x5-fold CV | Base + joint TyHGB-CRP exposure | Time-dependent AUC | 3-year | 2,745 | 289 | 0.719 | 0.052 | 0.709, 0.733 |  |
| 5x5-fold CV | Base model | Time-dependent AUC | 5-year | 2,745 | 289 | 0.651 | 0.000 | 0.643, 0.657 |  |
| 5x5-fold CV | Base + TyHGB | Time-dependent AUC | 5-year | 2,745 | 289 | 0.671 | 0.020 | 0.663, 0.674 |  |
| 5x5-fold CV | Base + CRP | Time-dependent AUC | 5-year | 2,745 | 289 | 0.652 | 0.001 | 0.646, 0.661 |  |
| 5x5-fold CV | Base + TyHGB + CRP | Time-dependent AUC | 5-year | 2,745 | 289 | 0.670 | 0.019 | 0.664, 0.675 |  |
| 5x5-fold CV | Base + joint TyHGB-CRP exposure | Time-dependent AUC | 5-year | 2,745 | 289 | 0.679 | 0.028 | 0.674, 0.687 |  |
| 5x5-fold CV | Base model | Harrell C-index | Overall | 2,745 | 289 | 0.624 | 0.000 | 0.619, 0.629 |  |
| 5x5-fold CV | Base + TyHGB | Harrell C-index | Overall | 2,745 | 289 | 0.646 | 0.022 | 0.642, 0.650 |  |
| 5x5-fold CV | Base + CRP | Harrell C-index | Overall | 2,745 | 289 | 0.624 | 0.000 | 0.620, 0.631 |  |
| 5x5-fold CV | Base + TyHGB + CRP | Harrell C-index | Overall | 2,745 | 289 | 0.645 | 0.021 | 0.641, 0.650 |  |
| 5x5-fold CV | Base + joint TyHGB-CRP exposure | Harrell C-index | Overall | 2,745 | 289 | 0.665 | 0.040 | 0.661, 0.669 |  |
| Bootstrap optimism-corrected | Base model | Time-dependent AUC | 3-year | 2,745 | 289 | 0.666 | 0.000 |  | 0.021 |
| Bootstrap optimism-corrected | Base + TyHGB | Time-dependent AUC | 3-year | 2,745 | 289 | 0.695 | 0.029 |  | 0.020 |
| Bootstrap optimism-corrected | Base + CRP | Time-dependent AUC | 3-year | 2,745 | 289 | 0.679 | 0.013 |  | 0.023 |
| Bootstrap optimism-corrected | Base + TyHGB + CRP | Time-dependent AUC | 3-year | 2,745 | 289 | 0.699 | 0.033 |  | 0.022 |
| Bootstrap optimism-corrected | Base + joint TyHGB-CRP exposure | Time-dependent AUC | 3-year | 2,745 | 289 | 0.724 | 0.058 |  | 0.019 |
| Bootstrap optimism-corrected | Base model | Time-dependent AUC | 5-year | 2,745 | 289 | 0.652 | 0.000 |  | 0.019 |
| Bootstrap optimism-corrected | Base + TyHGB | Time-dependent AUC | 5-year | 2,745 | 289 | 0.673 | 0.021 |  | 0.018 |
| Bootstrap optimism-corrected | Base + CRP | Time-dependent AUC | 5-year | 2,745 | 289 | 0.653 | 0.001 |  | 0.020 |
| Bootstrap optimism-corrected | Base + TyHGB + CRP | Time-dependent AUC | 5-year | 2,745 | 289 | 0.671 | 0.020 |  | 0.019 |
| Bootstrap optimism-corrected | Base + joint TyHGB-CRP exposure | Time-dependent AUC | 5-year | 2,745 | 289 | 0.682 | 0.030 |  | 0.018 |
| Bootstrap optimism-corrected | Base model | Harrell C-index | Overall | 2,745 | 289 | 0.625 | 0.000 |  | 0.020 |
| Bootstrap optimism-corrected | Base + TyHGB | Harrell C-index | Overall | 2,745 | 289 | 0.647 | 0.022 |  | 0.020 |
| Bootstrap optimism-corrected | Base + CRP | Harrell C-index | Overall | 2,745 | 289 | 0.625 | -0.000 |  | 0.021 |
| Bootstrap optimism-corrected | Base + TyHGB + CRP | Harrell C-index | Overall | 2,745 | 289 | 0.645 | 0.020 |  | 0.021 |
| Bootstrap optimism-corrected | Base + joint TyHGB-CRP exposure | Harrell C-index | Overall | 2,745 | 289 | 0.666 | 0.041 |  | 0.020 |

AUC, area under the receiver operating characteristic curve; CV, cross-validation. Delta vs base was calculated relative to the base model within the same method, metric, and time point. Empirical interval is shown for 5x5-fold CV results.

**Table S4.** Bootstrap optimism estimates for time-dependent AUC and Harrell C-index.

| **Model** | **Metric** | **Time point** | **Bootstrap iterations** | **Mean optimism** | **Optimism interval** |
| --- | --- | --- | --- | --- | --- |
| Base model | Time-dependent AUC | 3-year | 500 | 0.021 | -0.072, 0.111 |
| Base model | Time-dependent AUC | 5-year | 500 | 0.019 | -0.035, 0.070 |
| Base model | Harrell C-index | Overall | 500 | 0.020 | -0.010, 0.048 |
| Base + TyHGB | Time-dependent AUC | 3-year | 500 | 0.020 | -0.072, 0.106 |
| Base + TyHGB | Time-dependent AUC | 5-year | 500 | 0.018 | -0.032, 0.071 |
| Base + TyHGB | Harrell C-index | Overall | 500 | 0.020 | -0.012, 0.049 |
| Base + CRP | Time-dependent AUC | 3-year | 500 | 0.023 | -0.070, 0.107 |
| Base + CRP | Time-dependent AUC | 5-year | 500 | 0.020 | -0.029, 0.072 |
| Base + CRP | Harrell C-index | Overall | 500 | 0.021 | -0.009, 0.049 |
| Base + TyHGB + CRP | Time-dependent AUC | 3-year | 500 | 0.022 | -0.073, 0.105 |
| Base + TyHGB + CRP | Time-dependent AUC | 5-year | 500 | 0.019 | -0.029, 0.071 |
| Base + TyHGB + CRP | Harrell C-index | Overall | 500 | 0.021 | -0.010, 0.050 |
| Base + joint TyHGB-CRP exposure | Time-dependent AUC | 3-year | 500 | 0.019 | -0.069, 0.095 |
| Base + joint TyHGB-CRP exposure | Time-dependent AUC | 5-year | 500 | 0.018 | -0.035, 0.067 |
| Base + joint TyHGB-CRP exposure | Harrell C-index | Overall | 500 | 0.020 | -0.011, 0.047 |

Optimism interval is presented as lower and upper empirical limits from bootstrap resampling.

**Table S5.** IDI, continuous NRI, and median improvement for complete-case prediction models.

| **Time point** | **Comparison** | **N** | **Events** | **Metric** | **Estimate (95% CI)** | **P value** |
| --- | --- | --- | --- | --- | --- | --- |
| 3-year | Base + TyHGB vs base model | 2,745 | 289 | IDI | 0.001 (-0.001, 0.004) | 0.208 |
| 3-year | Base + TyHGB vs base model | 2,745 | 289 | Continuous NRI | 0.276 (0.033, 0.436) | 0.032 |
| 3-year | Base + TyHGB vs base model | 2,745 | 289 | Median improvement | 0.001 (-0.001, 0.002) | 0.072 |
| 3-year | Base + CRP vs base model | 2,745 | 289 | IDI | 0.001 (-0.000, 0.004) | 0.180 |
| 3-year | Base + CRP vs base model | 2,745 | 289 | Continuous NRI | 0.266 (-0.192, 0.411) | 0.160 |
| 3-year | Base + CRP vs base model | 2,745 | 289 | Median improvement | 0.001 (-0.001, 0.002) | 0.076 |
| 3-year | Base + TyHGB + CRP vs base model | 2,745 | 289 | IDI | 0.001 (-0.000, 0.006) | 0.104 |
| 3-year | Base + TyHGB + CRP vs base model | 2,745 | 289 | Continuous NRI | 0.252 (-0.002, 0.408) | 0.052 |
| 3-year | Base + TyHGB + CRP vs base model | 2,745 | 289 | Median improvement | 0.001 (-0.000, 0.003) | 0.052 |
| 3-year | Base + joint TyHGB-CRP exposure vs base model | 2,745 | 289 | IDI | 0.004 (0.001, 0.008) | 0.016 |
| 3-year | Base + joint TyHGB-CRP exposure vs base model | 2,745 | 289 | Continuous NRI | 0.300 (0.171, 0.408) | <0.001 |
| 3-year | Base + joint TyHGB-CRP exposure vs base model | 2,745 | 289 | Median improvement | 0.003 (0.001, 0.008) | 0.004 |
| 5-year | Base + TyHGB vs base model | 2,745 | 289 | IDI | 0.004 (0.001, 0.011) | 0.024 |
| 5-year | Base + TyHGB vs base model | 2,745 | 289 | Continuous NRI | 0.245 (0.110, 0.330) | <0.001 |
| 5-year | Base + TyHGB vs base model | 2,745 | 289 | Median improvement | 0.002 (0.000, 0.003) | 0.012 |
| 5-year | Base + CRP vs base model | 2,745 | 289 | IDI | 0.001 (-0.000, 0.006) | 0.311 |
| 5-year | Base + CRP vs base model | 2,745 | 289 | Continuous NRI | 0.085 (-0.065, 0.187) | 0.251 |
| 5-year | Base + CRP vs base model | 2,745 | 289 | Median improvement | 0.001 (-0.001, 0.002) | 0.196 |
| 5-year | Base + TyHGB + CRP vs base model | 2,745 | 289 | IDI | 0.004 (0.001, 0.013) | 0.016 |
| 5-year | Base + TyHGB + CRP vs base model | 2,745 | 289 | Continuous NRI | 0.220 (0.090, 0.317) | <0.001 |
| 5-year | Base + TyHGB + CRP vs base model | 2,745 | 289 | Median improvement | 0.002 (0.000, 0.005) | 0.004 |
| 5-year | Base + joint TyHGB-CRP exposure vs base model | 2,745 | 289 | IDI | 0.006 (0.001, 0.012) | 0.020 |
| 5-year | Base + joint TyHGB-CRP exposure vs base model | 2,745 | 289 | Continuous NRI | 0.217 (0.118, 0.305) | <0.001 |
| 5-year | Base + joint TyHGB-CRP exposure vs base model | 2,745 | 289 | Median improvement | 0.006 (0.004, 0.017) | <0.001 |

IDI, integrated discrimination improvement; NRI, net re

**Table S6.** Sensitivity analysis using complete-case Cox regression.

| **Model** | **Exposure group** | **N** | **Events** | **HR (95% CI)** | **P value** |
| --- | --- | --- | --- | --- | --- |
| Model_1 | Low TyHGB + Low CRP | 2,745 | 289 | 1.00 (Reference) |  |
| High TyHGB + Low CRP | 2.78 (1.92, 4.01) | <0.001 |
| Low TyHGB + High CRP | 1.19 (0.75, 1.88) | 0.454 |
| High TyHGB + High CRP | 3.01 (2.12, 4.26) | <0.001 |
| Model_2 | Low TyHGB + Low CRP | 1.00 (Reference) |  |
| High TyHGB + Low CRP | 2.75 (1.91, 3.98) | <0.001 |
| Low TyHGB + High CRP | 1.19 (0.75, 1.88) | 0.455 |
| High TyHGB + High CRP | 2.95 (2.08, 4.20) | <0.001 |
| Model_3 | Low TyHGB + Low CRP | 1.00 (Reference) |  |
| High TyHGB + Low CRP | 2.57 (1.78, 3.73) | <0.001 |
| Low TyHGB + High CRP | 1.18 (0.75, 1.87) | 0.475 |
| High TyHGB + High CRP | 2.62 (1.83, 3.75) | <0.001 |

Model adjustment was the same as described in Table 2.

**Table S7.** Sensitivity analysis excluding incident CMM within 2 years.

| **Model** | **Exposure group** | **N** | **Events** | **HR (95% CI)** | **P value** |
| --- | --- | --- | --- | --- | --- |
| Model_1 | Low TyHGB + Low CRP | 3,803 | 318 | 1.00 (Reference) |  |
| High TyHGB + Low CRP | 3.09 (2.19, 4.37) | <0.001 |
| Low TyHGB + High CRP | 1.41 (0.93, 2.13) | 0.107 |
| High TyHGB + High CRP | 2.99 (2.14, 4.18) | <0.001 |
| Model_2 | Low TyHGB + Low CRP | 1.00 (Reference) |  |
| High TyHGB + Low CRP | 3.04 (2.15, 4.30) | <0.001 |
| Low TyHGB + High CRP | 1.41 (0.93, 2.13) | 0.107 |
| High TyHGB + High CRP | 2.85 (2.04, 4.00) | <0.001 |
| Model_3 | Low TyHGB + Low CRP | 1.00 (Reference) |  |
| High TyHGB + Low CRP | 2.82 (1.99, 4.00) | <0.001 |
| Low TyHGB + High CRP | 1.40 (0.93, 2.12) | 0.111 |
| High TyHGB + High CRP | 2.50 (1.78, 3.53) | <0.001 |

Model adjustment was the same as described in Table 2.

**Table S8.** Sensitivity analysis restricted to participants with baseline CMD0.

| **Model** | **Exposure group** | **N** | **Events** | **HR (95% CI)** | **P value** |
| --- | --- | --- | --- | --- | --- |
| Model_1 | Low TyHGB + Low CRP | 2,689 | 118 | 1.00 (Reference) |  |
| High TyHGB + Low CRP | 2.41 (1.40, 4.14) | 0.002 |
| Low TyHGB + High CRP | 1.79 (1.04, 3.09) | 0.037 |
| High TyHGB + High CRP | 2.34 (1.40, 3.92) | 0.001 |
| Model_2 | Low TyHGB + Low CRP | 1.00 (Reference) |  |
| High TyHGB + Low CRP | 2.38 (1.38, 4.10) | 0.002 |
| Low TyHGB + High CRP | 1.79 (1.04, 3.09) | 0.037 |
| High TyHGB + High CRP | 2.27 (1.35, 3.82) | 0.002 |
| Model_3 | Low TyHGB + Low CRP | 1.00 (Reference) |  |
| High TyHGB + Low CRP | 2.24 (1.30, 3.88) | 0.004 |
| Low TyHGB + High CRP | 1.79 (1.03, 3.09) | 0.038 |
| High TyHGB + High CRP | 2.02 (1.19, 3.42) | 0.009 |

Model adjustment was the same as described in Table 2.

**Table S9.** Sensitivity analysis excluding participants with CRP > 10 mg/L.

| **Model** | **Exposure group** | **N** | **Events** | **HR (95% CI)** | **P value** |
| --- | --- | --- | --- | --- | --- |
| Model_1 | Low TyHGB + Low CRP | 3,645 | 352 | 1.00 (Reference) |  |
| High TyHGB + Low CRP | 3.19 (2.29, 4.44) | <0.001 |
| Low TyHGB + High CRP | 1.50 (1.01, 2.24) | 0.047 |
| High TyHGB + High CRP | 3.32 (2.41, 4.58) | <0.001 |
| Model_2 | Low TyHGB + Low CRP | 1.00 (Reference) |  |
| High TyHGB + Low CRP | 3.14 (2.25, 4.37) | <0.001 |
| Low TyHGB + High CRP | 1.50 (1.00, 2.23) | 0.048 |
| High TyHGB + High CRP | 3.19 (2.31, 4.40) | <0.001 |
| Model_3 | Low TyHGB + Low CRP | 1.00 (Reference) |  |
| High TyHGB + Low CRP | 2.92 (2.09, 4.07) | <0.001 |
| Low TyHGB + High CRP | 1.50 (1.00, 2.23) | 0.048 |
| High TyHGB + High CRP | 2.82 (2.03, 3.91) | <0.001 |

Model adjustment was the same as described in Table 2.

**Table S10.** Sensitivity analysis excluding participants with baseline cancer or liver disease.

| **Model** | **Exposure group** | **N** | **Events** | **HR (95% CI)** | **P value** |
| --- | --- | --- | --- | --- | --- |
| Model_1 | Low TyHGB + Low CRP | 3,708 | 356 | 1.00 (Reference) |  |
| High TyHGB + Low CRP | 3.21 (2.28, 4.51) | <0.001 |
| Low TyHGB + High CRP | 1.47 (0.98, 2.20) | 0.062 |
| High TyHGB + High CRP | 3.43 (2.48, 4.74) | <0.001 |
| Model_2 | Low TyHGB + Low CRP | 1.00 (Reference) |  |
| High TyHGB + Low CRP | 3.17 (2.25, 4.46) | <0.001 |
| Low TyHGB + High CRP | 1.46 (0.98, 2.19) | 0.064 |
| High TyHGB + High CRP | 3.32 (2.39, 4.60) | <0.001 |
| Model_3 | Low TyHGB + Low CRP | 1.00 (Reference) |  |
| High TyHGB + Low CRP | 2.96 (2.10, 4.17) | <0.001 |
| Low TyHGB + High CRP | 1.45 (0.97, 2.17) | 0.072 |
| High TyHGB + High CRP | 2.92 (2.09, 4.07) | <0.001 |

Model adjustment was the same as described in Table 2.

**Table S11.** Fine–Gray competing-risk analysis for the association between joint TyHGB–CRP exposure and incident CMM.

| **Model** | **Exposure group** | **N** | **Events** | **Competing deaths** | **SHR (95% CI)** | **P value** | **P for overall** |
| --- | --- | --- | --- | --- | --- | --- | --- |
| Model_1 | Low TyHGB + Low CRP | 3,857 | 372 | 84 | 1.00 (Reference) |  | <0.001 |
| High TyHGB + Low CRP | 3.11 (2.25, 4.30) | <0.001 |
| Low TyHGB + High CRP | 1.42 (0.97, 2.09) | 0.073 |
| High TyHGB + High CRP | 3.24 (2.38, 4.41) | <0.001 |
| Model_2 | Low TyHGB + Low CRP | 1.00 (Reference) |  |
| High TyHGB + Low CRP | 3.07 (2.22, 4.24) | <0.001 |
| Low TyHGB + High CRP | 1.42 (0.97, 2.09) | 0.074 |
| High TyHGB + High CRP | 3.13 (2.29, 4.29) | <0.001 |
| Model_3 | Low TyHGB + Low CRP | 1.00 (Reference) |  |
| High TyHGB + Low CRP | 2.85 (2.06, 3.94) | <0.001 |
| Low TyHGB + High CRP | 1.42 (0.97, 2.08) | 0.072 |
| High TyHGB + High CRP | 2.76 (2.01, 3.79) | <0.001 |

Model adjustment was the same as described in Table 2.


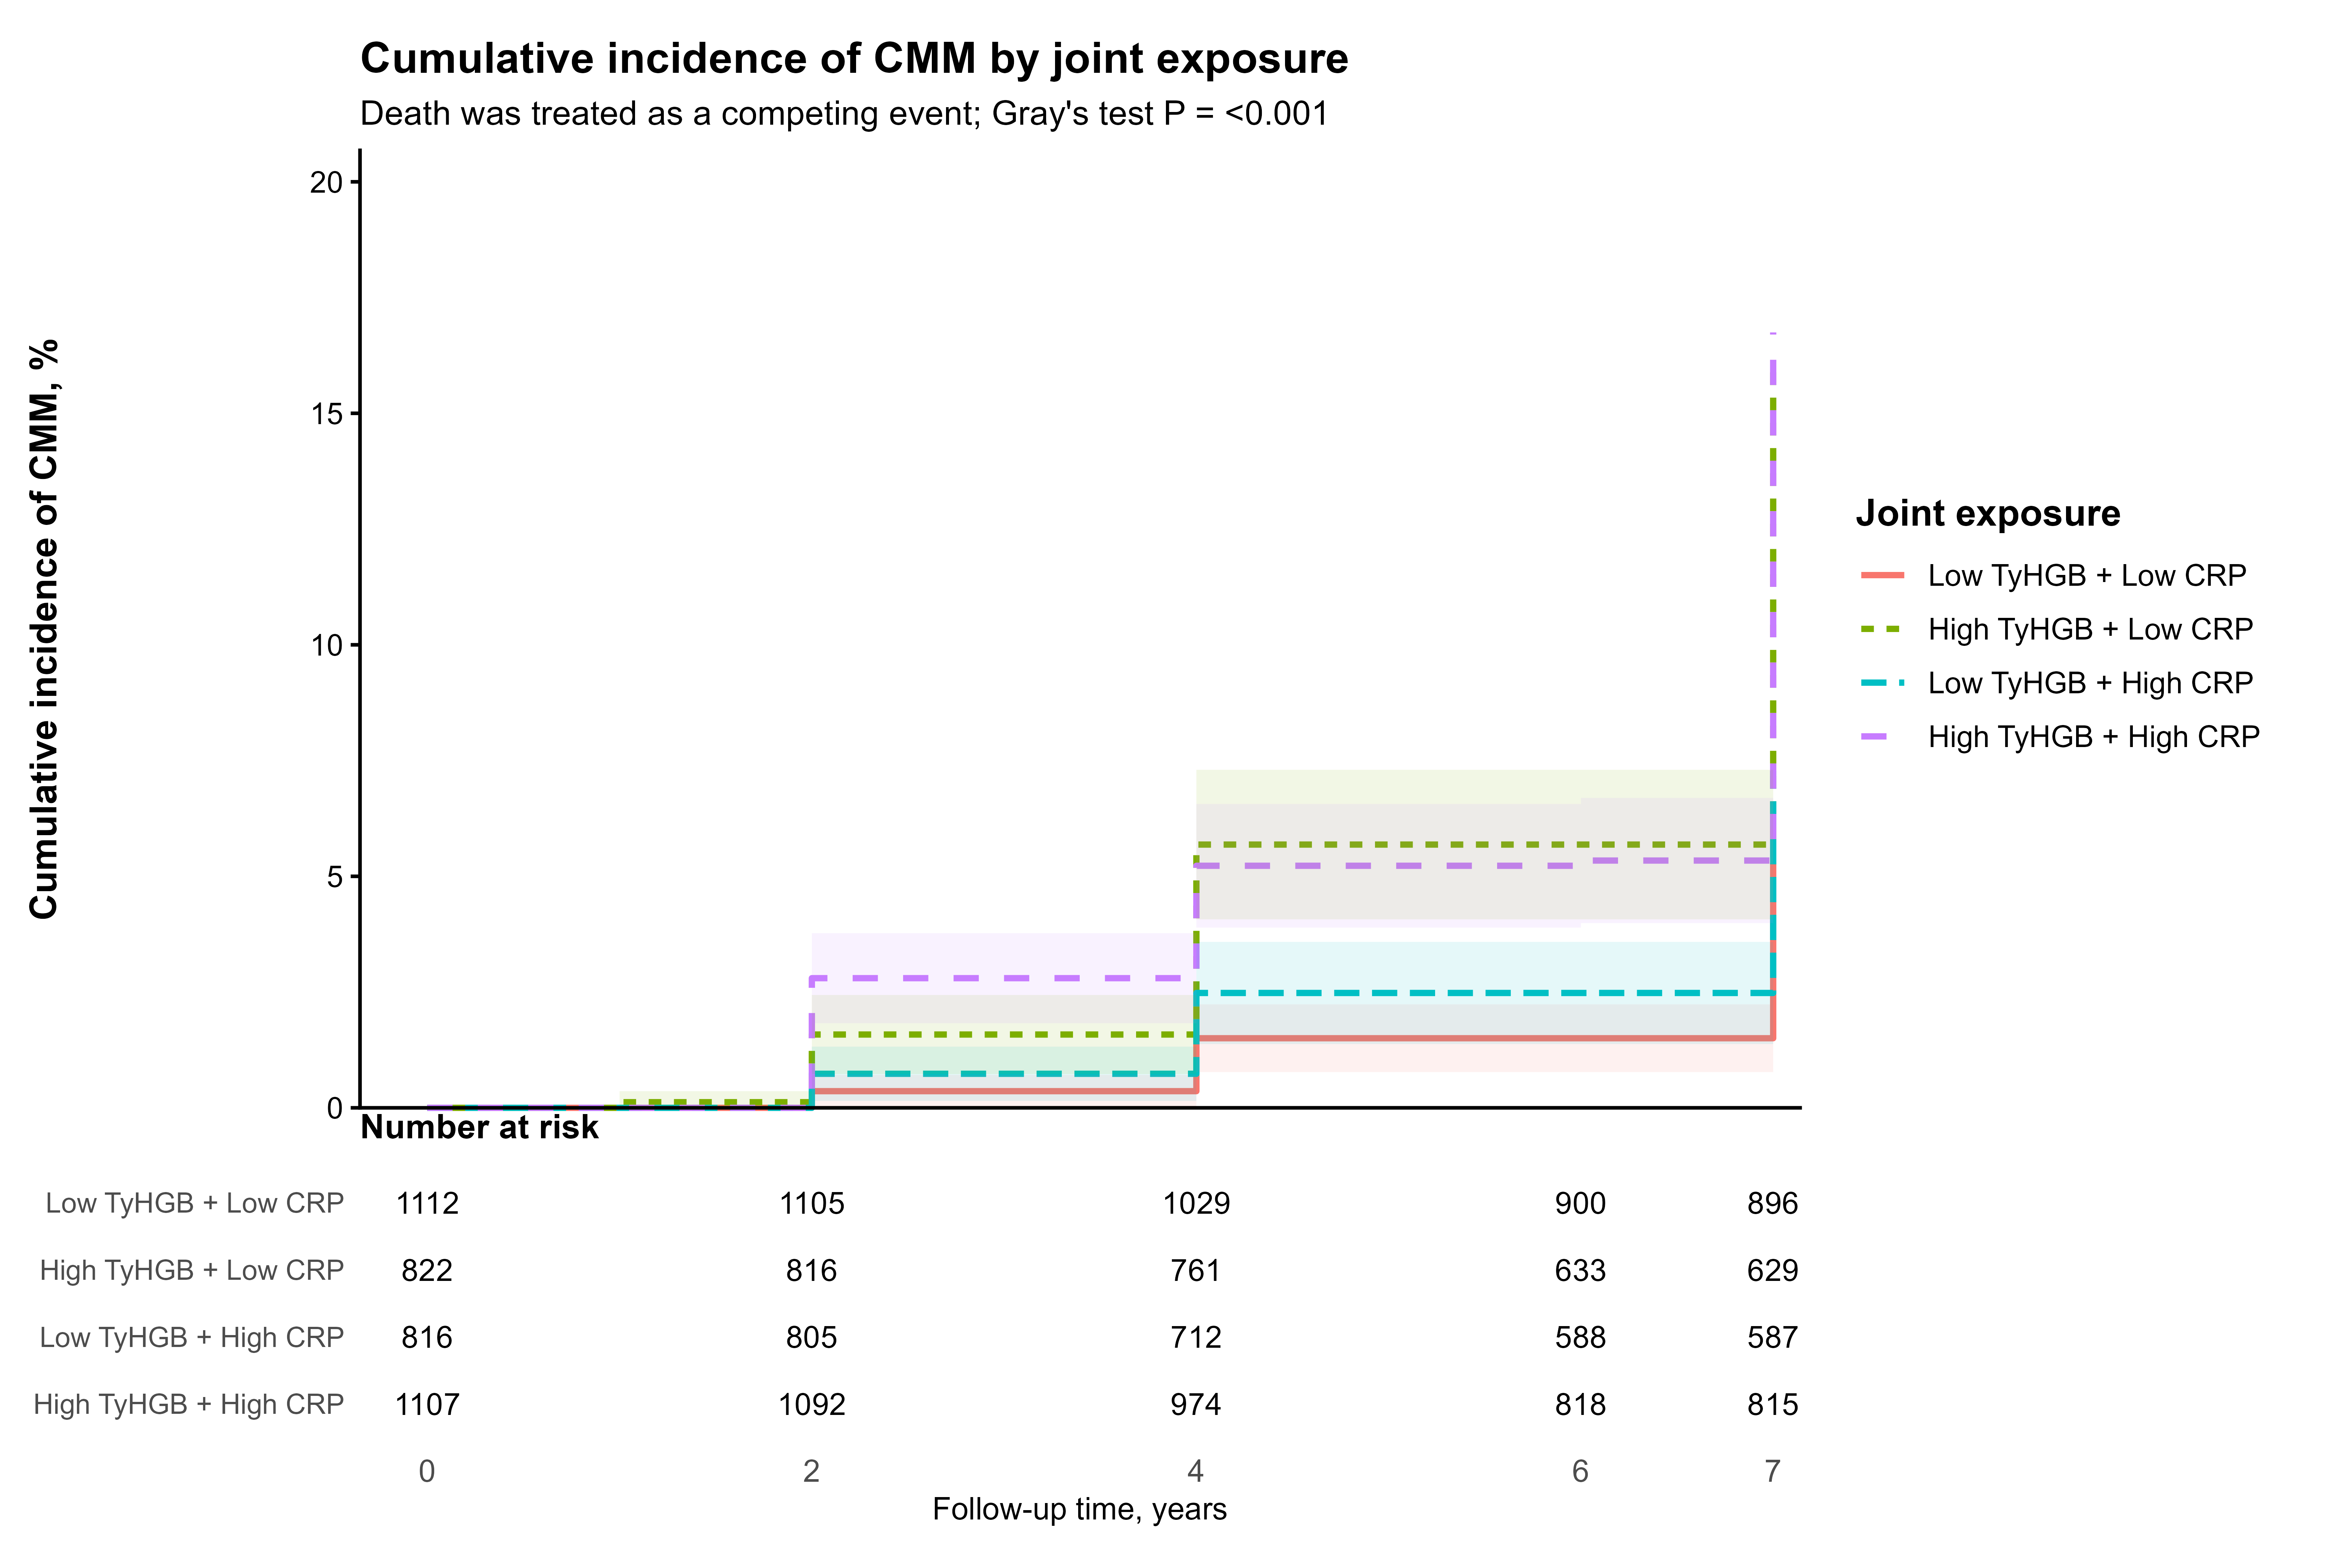


**Fig. S1** Cumulative incidence function curves for CMM by combined TyHGB and CRP.CIF curves were plotted across the four joint TyHGB–CRP groups, with death treated as a competing event.


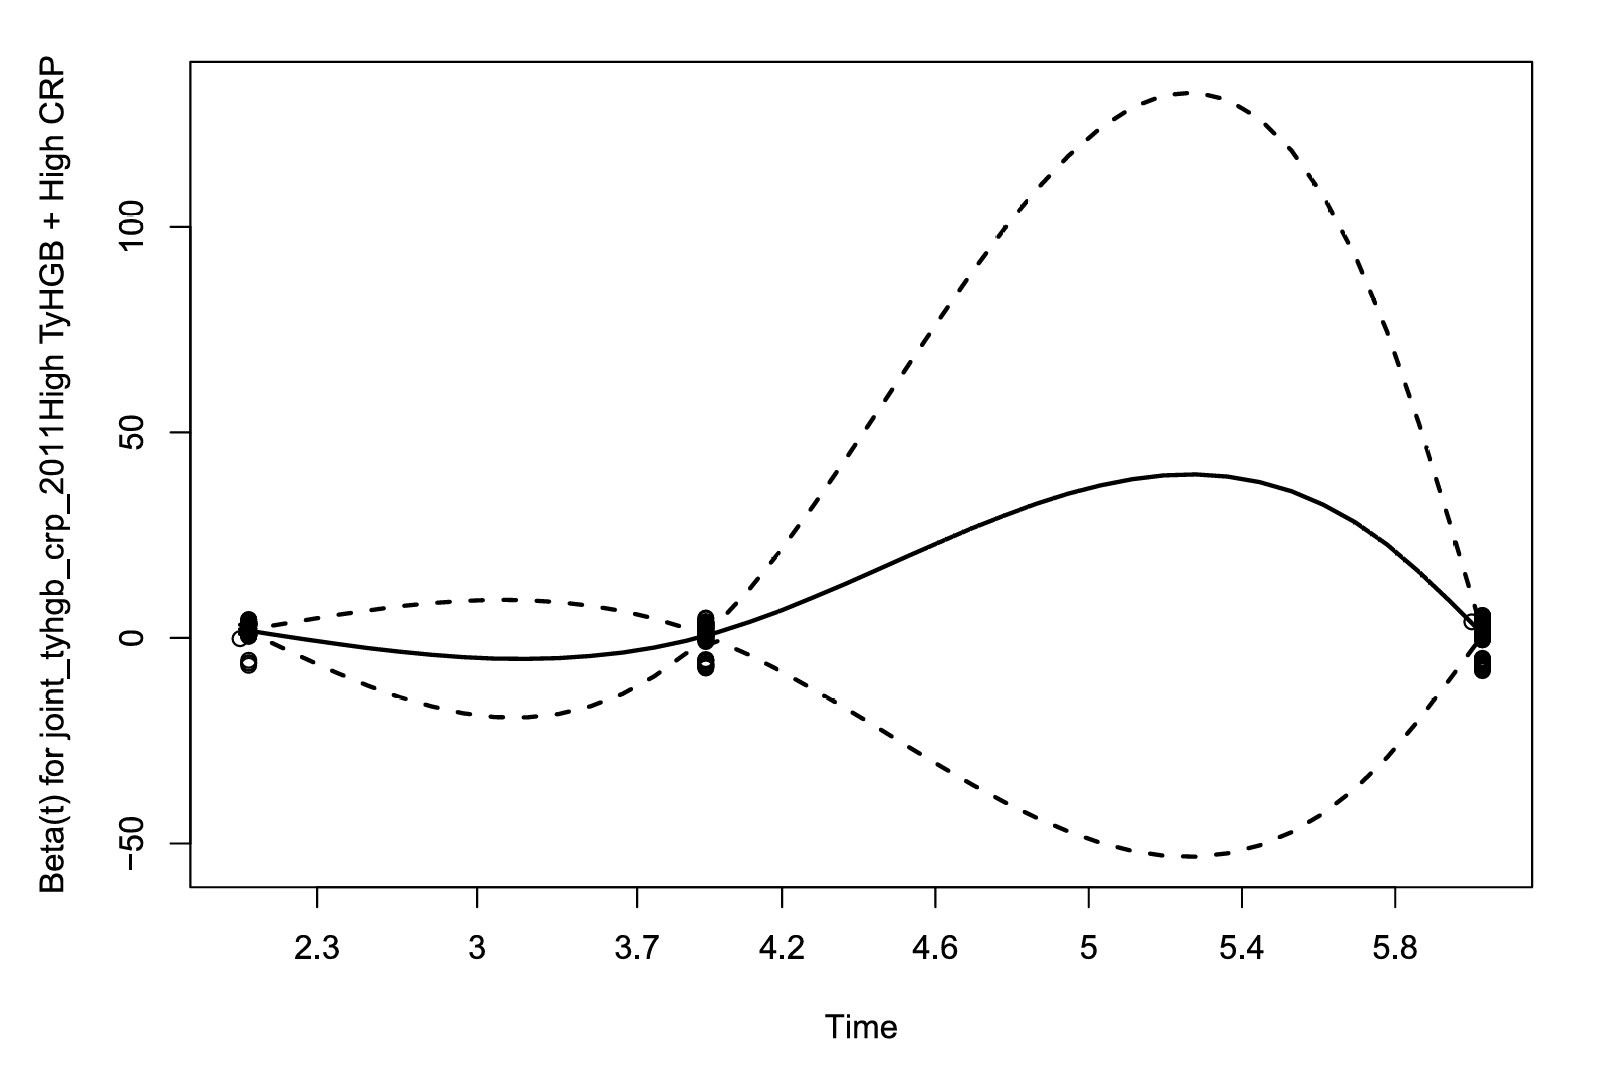


**Fig. S2** Schoenfeld residual plots for the proportional hazards assumption.Schoenfeld residual plots were used to evaluate the proportional hazards assumption for the joint TyHGB–CRP exposure in the fully adjusted Cox model.
